# Supplementary material
Source: publisher figshare collection journal article supplement (https://frontiersin.figshare.com/ndownloader/files/27484043)
Supplement: Supplementary file [file 27484043]

## Appendix 2

### Reliability Analysis for Foreign Language Enjoyment Scale

|    | Item                                                     | Corrected item–<br>total correlation | Cronbach alpha<br>if item deleted |
|----|----------------------------------------------------------|--------------------------------------|-----------------------------------|
| 1  | I can be creative in learning English                    | .448                                 | .832                              |
| 2  | I can laugh off embarrassing mistakes in English writing | .323                                 | .840                              |
| 3  | I don't get bored of learning English                    | .312                                 | .844                              |
| 4  | I enjoy English.                                         | .451                                 | .831                              |
| 5  | I often feel happy during the English class              | .408                                 | .833                              |
| 6  | I learnt to express myself better in English             | .433                                 | .832                              |
| 7  | I'm a worthy member of the English class                 | .519                                 | .828                              |
| 8  | I've learnt interesting things by learning English       | .448                                 | .831                              |
| 9  | In class, I feel proud of my accomplishments             | .477                                 | .829                              |
| 10 | It's a positive environment                              | .533                                 | .828                              |
| 11 | It's cool to know English                                | .341                                 | .843                              |
| 12 | English's fun                                            | .317                                 | .838                              |
| 13 | Making errors is part of the learning process            | .332                                 | .838                              |
| 14 | The classmates are nice                                  | .375                                 | .834                              |
| 15 | The teacher is encouraging                               | .463                                 | .830                              |
| 16 | The teacher is friendly                                  | .463                                 | .830                              |
| 17 | The teacher is supportive                                | .428                                 | .832                              |
| 18 | There is a good atmosphere                               | .422                                 | .832                              |
| 19 | We form a tight group                                    | .506                                 | .829                              |

|    |                                                                |      |      |
|----|----------------------------------------------------------------|------|------|
| 20 | My English class is active, for example, we are running jokes. | .637 | .822 |
| 21 | We laugh a lot in English classes.                             | .502 | .829 |
